# Supplementary material
Source: PubMed Central journal article supplement (PMC5080661)
Supplement: NIHMS819020-supplement.pdf [file NIHMS819020-supplement.pdf]

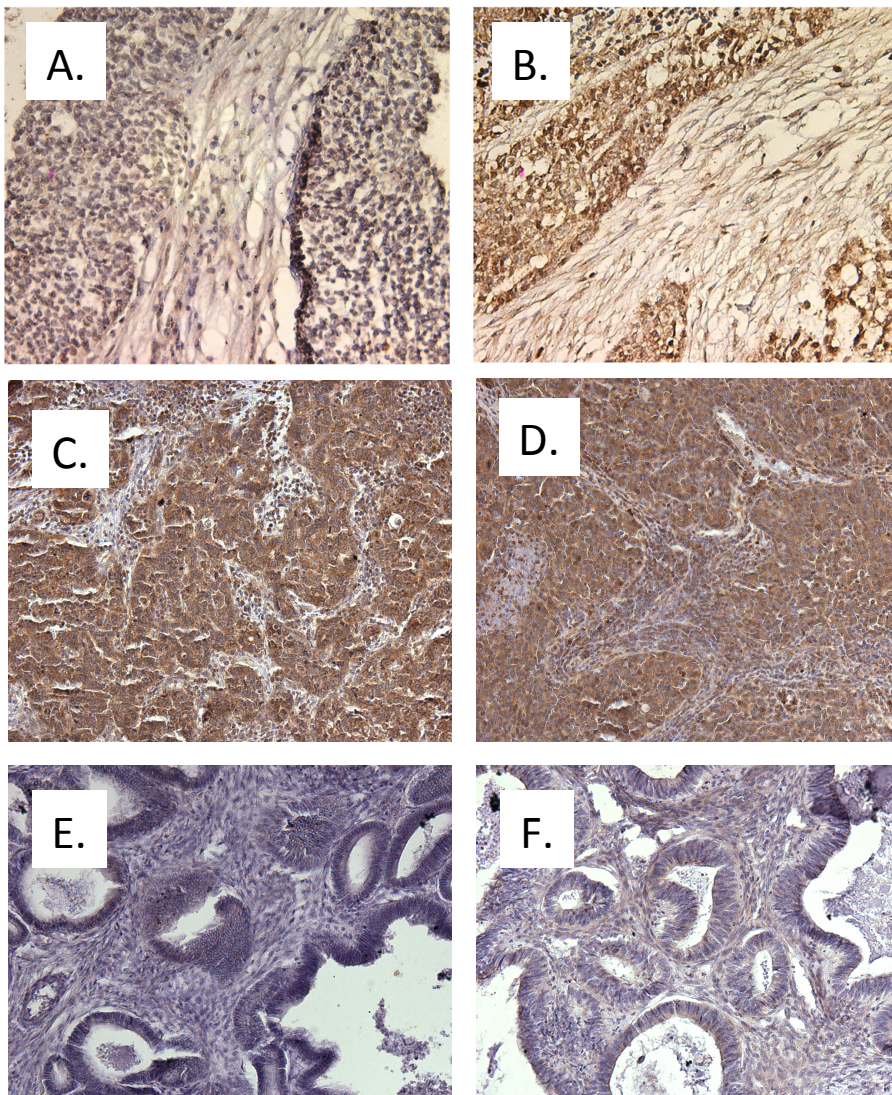

**Figure S1. Typical Immunohistochemical staining of Cyclin A1 in ovarian tumors.**

(A) Negative staining in a high-grade serous case OV741 without recurrence ; (B) Positive staining in another high-grade serous case OV657 with a relapse time of 4 months;

(C and D) Positive staining in an endometrioid case OV120 with recurrence; (E and F) Negative staining in an endometrioid case OV163 without any relapse.

Antibodies used: BD Biosciences mouse monoclonal antibody for (A, B, C, and E) and Abcam rabbit antibody for (D and F).

**Table S1. Histological subtypes of the cancer cell lines.**

|                   |                                                                                                                                |
|-------------------|--------------------------------------------------------------------------------------------------------------------------------|
| High-grade serous | ALST, DOV13, CAO3, SKOV3, PEOH, OVCA3, OVCA420, OVCA429, OVCA432, OVCA433, OVCA633, OVCA680, OVCA702, OVCA712, OVCA882, OV2008 |
| Clear cell        | OVCA810, ES-2, TOV21G, RMG-1                                                                                                   |
| Mucinous          | MCAS, RMUG-S, RMUG-L                                                                                                           |
| Endometrioid      | TOV-112D                                                                                                                       |
